# Supplementary material for: Akkermansia muciniphila mediates negative effects of IFNγ on glucose metabolism
Source: PubMed Central journal article supplement (PMC5114536; doi:10.1038/ncomms13329), 2016-11-14
Supplement: ncomms13329-s1.pdf [file ncomms13329-s1.pdf]

## Supplementary Materials

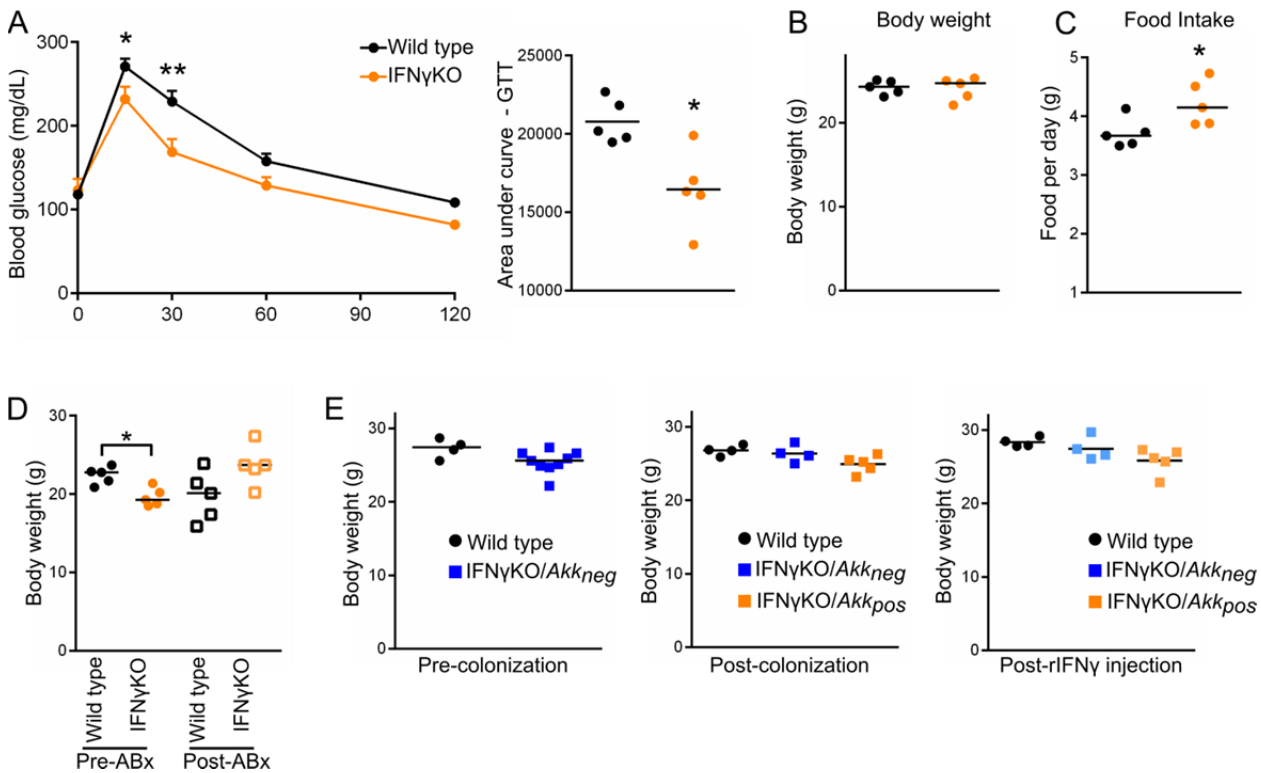

### Supplementary Figure 1: Improved glucose tolerance in IFN $\gamma$ KO mice is not explained by reduced weight or food intake

**(A-C)** Measurement of glucose tolerance (A), body weight (B), and food intake per day (C) in a cohort of wild type and IFN $\gamma$ KO mice. **(D)** Body weight measurements for groups analyzed in Fig. 1A. **(E)** Body weight measurements for glucose tolerance experiments shown in Fig. 3. Glucose tolerance curves shown as mean  $\pm$  SEM. Median line is displayed on dot plots. n=5 per group for (A-D). n=5 per group or as indicated by individual points. \*p<0.05, \*\*p<0.01 by one-tailed Mann-Whitney test.

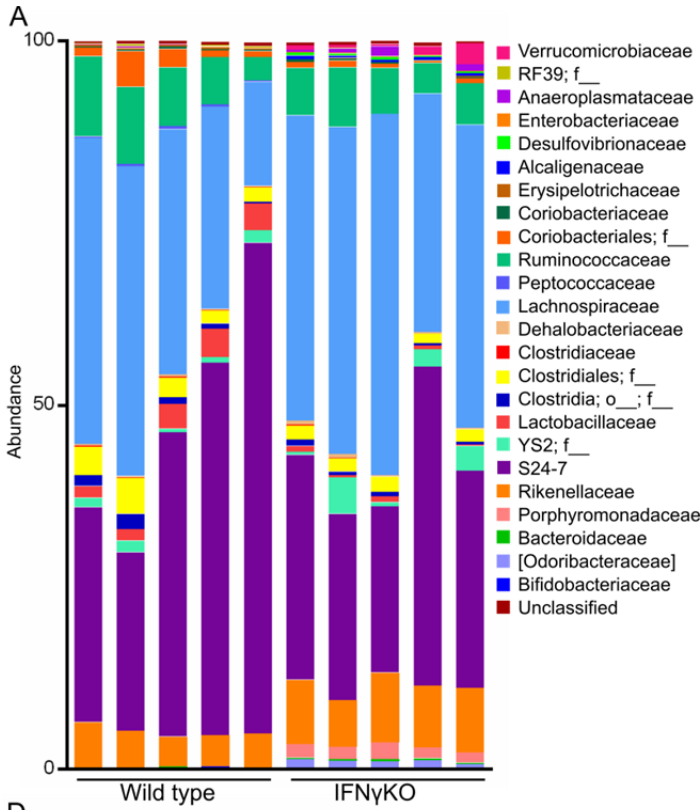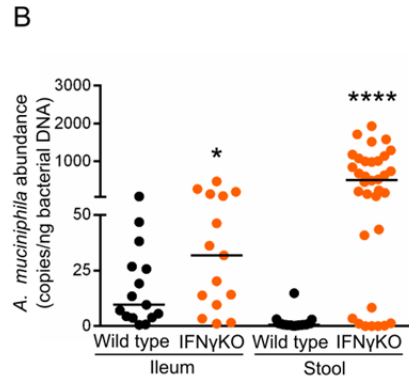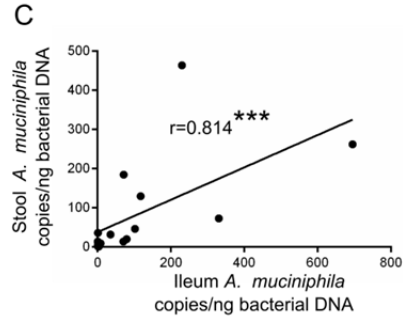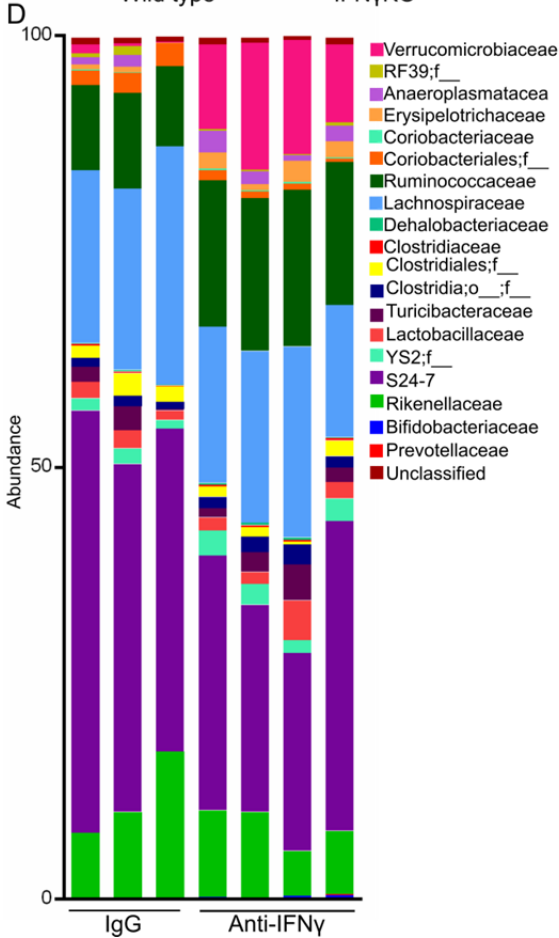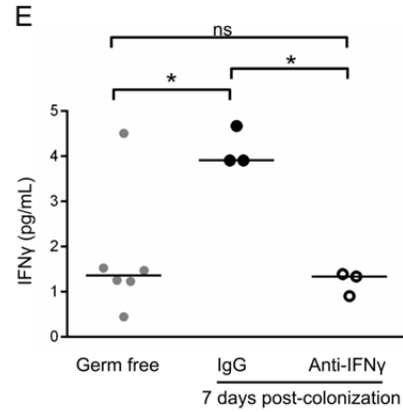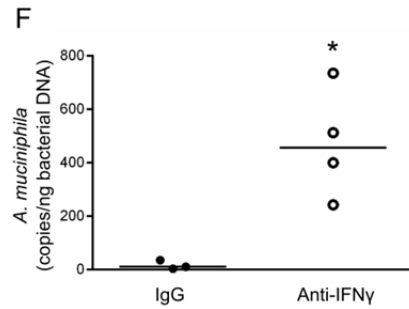

## Supplementary Figure 2: Altered microbiota composition in IFN $\gamma$ KO mice and by IFN $\gamma$ neutralization during colonization

**(A)** Relative abundances (percent of total 16S gene sequences) of microbial families in representative samples of wild type and IFN $\gamma$ KO mice. Each bar represents one individual. Where family assignment could not be made, the most specific level of assignment available is provided. **(B)** *A. muciniphila* quantification in whole ileum and stool by qPCR in wild type and IFN $\gamma$ KO mice. **(C)** Spearman correlation of *A. muciniphila* in stool to *A. muciniphila* in whole ileum represented as copies *A. muciniphila* genome/ng total 16S DNA. **(D)** Relative abundances (percent of total 16S gene sequences) of microbial families in representative samples of IgG and anti-IFN $\gamma$  treatment seven days after colonization with microbes. Where family assignment could not be made, the most specific level of assignment available is provided. Each bar represents one individual. **(E)** Serum levels of IFN $\gamma$  in germ free mice and during colonization of germ free mice with and without neutralization of IFN $\gamma$  by antibody injection. **(F)** *A. muciniphila* abundance in the cecum by in anti-IFN $\gamma$  and IgG control treatments, represented as copies *A. muciniphila* genome/ng total 16S DNA determined by qPCR. All individuals are shown, median line is displayed on dot plots. \* $p < 0.05$ , \*\*\* $p < 0.001$ , \*\*\*\* $p < 0.0001$  by one-tailed Mann-Whitney test.

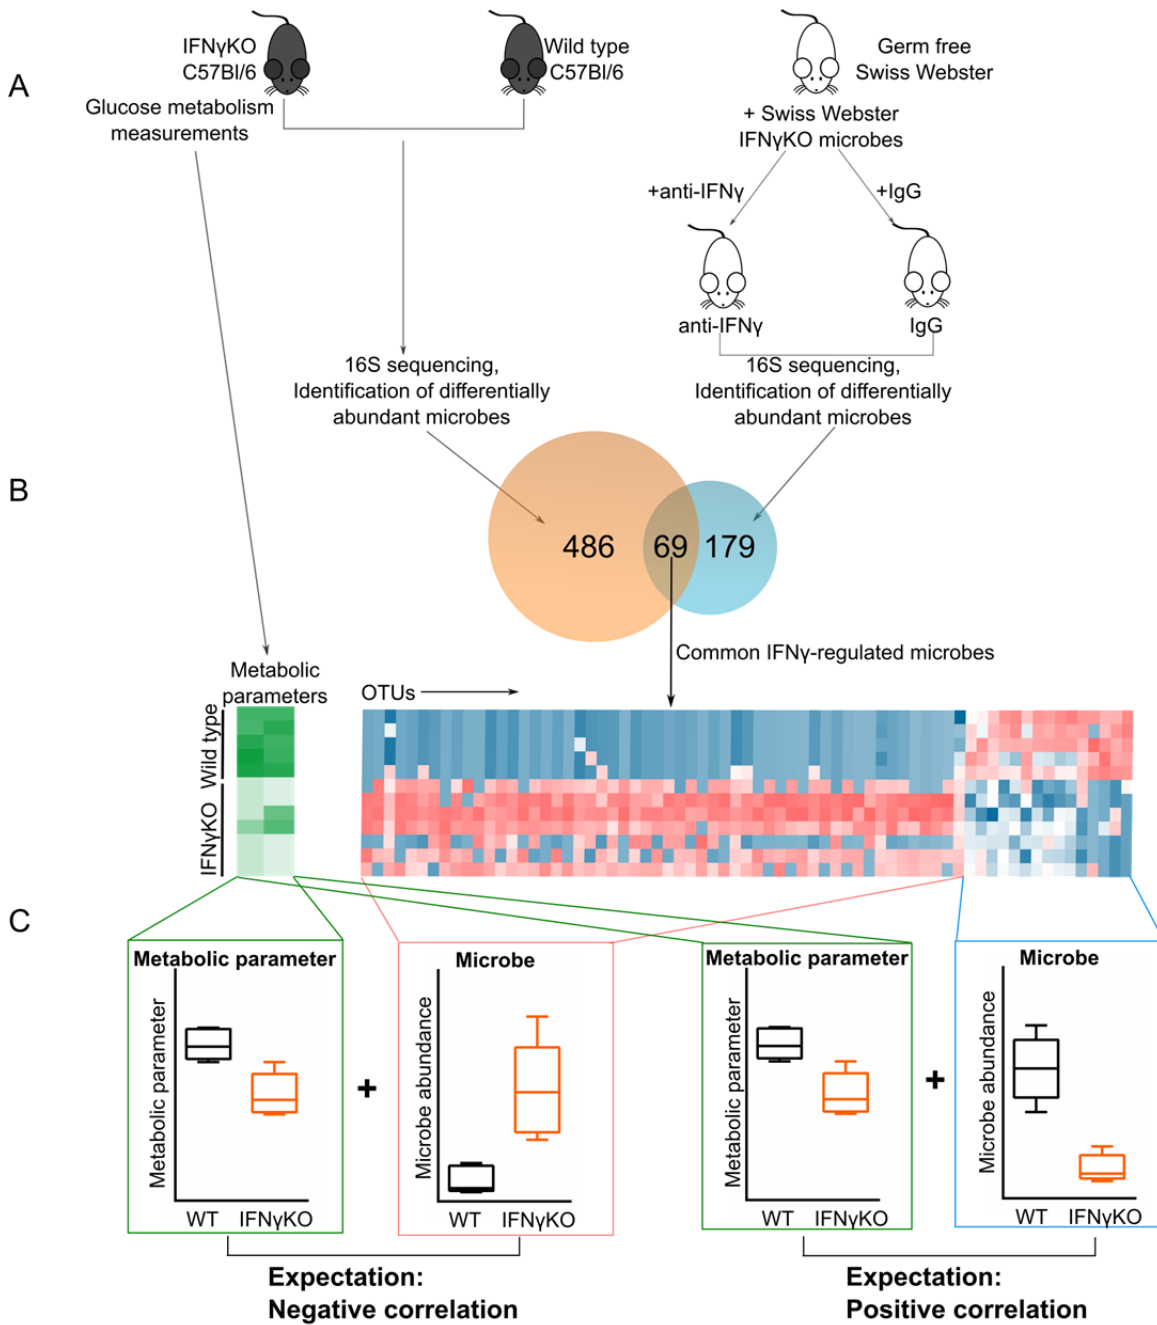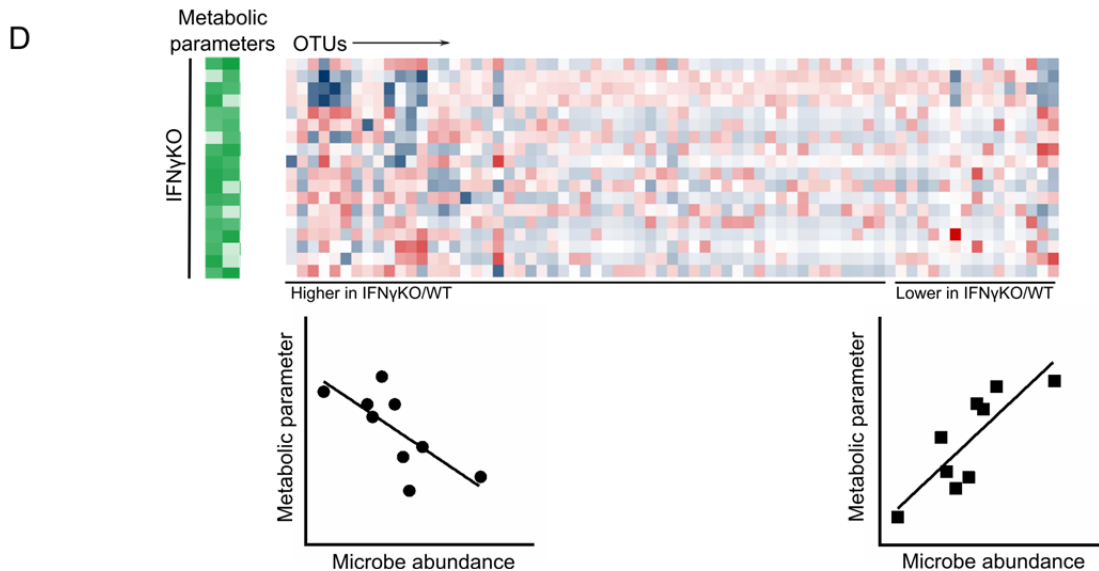

### **Figure 3: Scheme of experiments and analyses for causal inference of IFN $\gamma$ -regulated microbial regulators of glucose tolerance**

To identify candidate microbes for regulation of the effect of IFN $\gamma$  on glucose metabolism we employed a strategy based on causal inference as outlined here using representative data. **(A)** Two independent experimental perturbations of IFN $\gamma$  levels were employed – genetic knockout and neutralizing antibody treatment. **(B)** Microbiota composition of each comparison described in (A) was determined by 16S rRNA sequencing and differentially abundant microbes within each perturbation experiment were identified. From these microbes, those in common to both experimental strategies were considered for further analysis, as they demonstrate consistent regulation by IFN $\gamma$ . **(C)** Given that glucose metabolism parameters show a positive correlation with IFN $\gamma$  presence (i.e. fasting glucose and glucose tolerance measurements are higher in wild type and IgG comparing to IFN $\gamma$ KO and anti-IFN $\gamma$ , respectively, as shown in (B)), we can establish an expected relationship between each OTU and metabolic parameters. Specifically, we expect that microbes that are higher in the absence of IFN $\gamma$  will have a negative correlation with metabolic parameters (high microbe abundance in the context of low metabolic measures). Correspondingly, OTUs that have lower abundance in the absence of IFN $\gamma$  are expected to have a positive correlation with metabolic parameters if they are true candidates for metabolic regulators. **(D)** To identify correlations, we utilized natural variation in both OTU abundance and metabolic parameter measurements within IFN $\gamma$ KO mice. Representative data for metabolic parameters and OTU abundance has now been scaled only on IFN $\gamma$ KO mice to demonstrate intergroup variability. Those OTUs that do not match expectations as laid out in (C) are eliminated as possible candidates. In this manner we more precisely identify predicted IFN $\gamma$ -dependent microbial regulators of glucose metabolism.

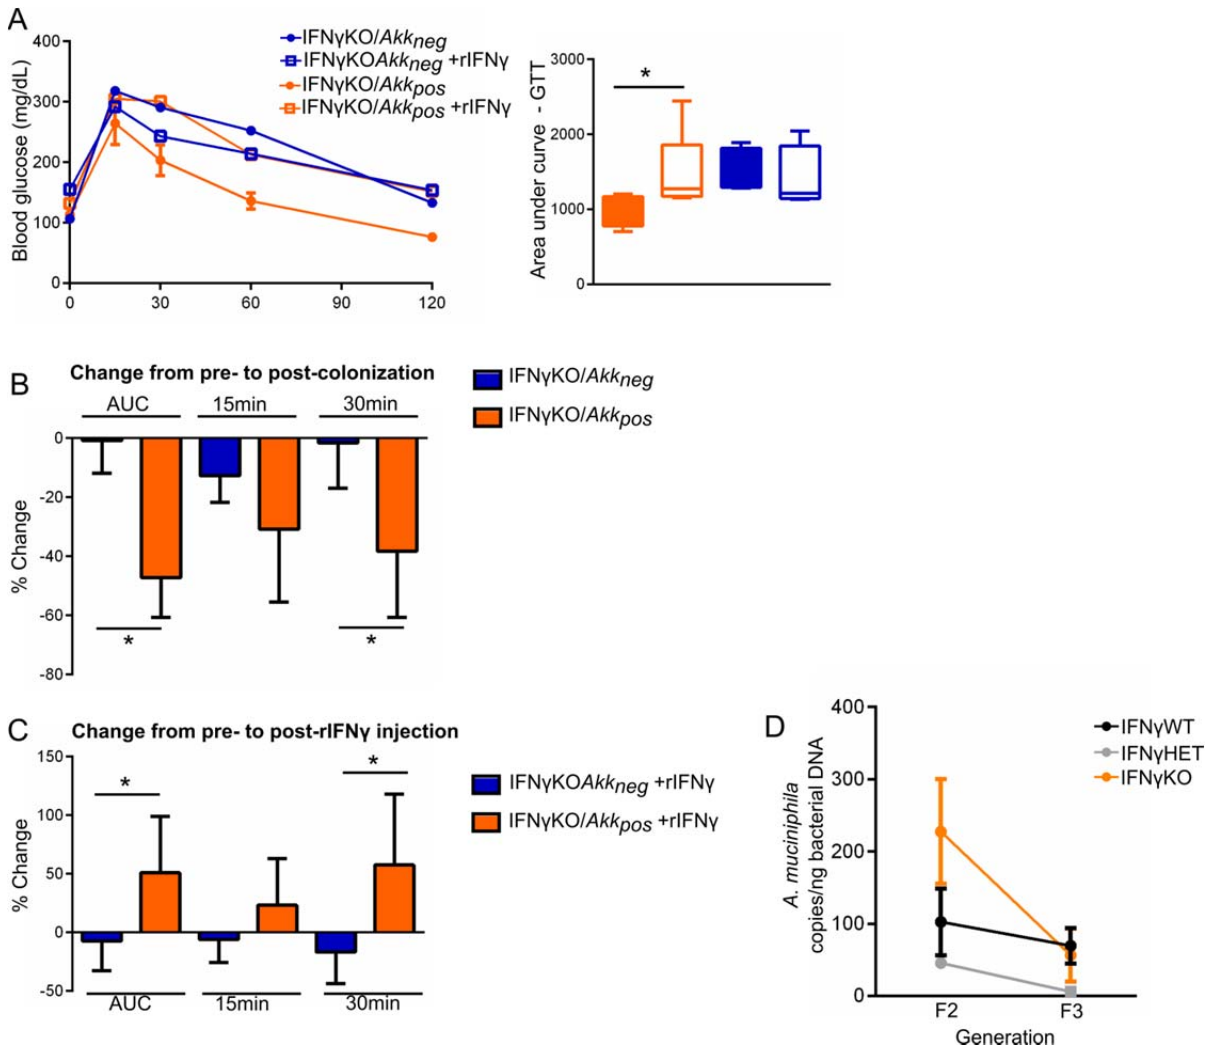

### Supplementary Figure 4: Worsening of glucose tolerance by IFN $\gamma$ injection requires *A. muciniphila*

Additional analysis of experiments described in Fig. 2, showing comparison of IP-GTT in IFN $\gamma$ /*Akk*<sub>pos</sub> and IFN $\gamma$ /*Akk*<sub>neg</sub> mice before and after two weeks of injection of rIFN $\gamma$ . **(A)** Glucose tolerance test pre- and post-rIFN $\gamma$  injection showing comparison of all groups. Solid symbols represent post-colonization (pre-injection) time points and open symbols represent post-rIFN $\gamma$  injection. IFN $\gamma$ /*Akk*<sub>neg</sub> mice are in blue and IFN $\gamma$ /*Akk*<sub>pos</sub> mice are in orange. **(B)** Percent change of AUC-GTT, 15 minute and 30 minute glucose measures between pre-colonization and post-colonization time point in IFN $\gamma$ /*Akk*<sub>pos</sub> and IFN $\gamma$ /*Akk*<sub>neg</sub> mice. **(C)** Percent change of AUC-GTT, 15 minute and 30 minute glucose measure between post-colonization time point and post-rIFN $\gamma$  injection time point in IFN $\gamma$ /*Akk*<sub>pos</sub> and IFN $\gamma$ /*Akk*<sub>neg</sub> mice. **(D)** Levels of *A. muciniphila* in stool, assessed by qPCR over two generations of heterozygous interbreeding. F0 breeding of IFN $\gamma$ KO to C57Bl/6 wild type was used to generation heterozygous F1 offspring. These heterozygous F1 mice were then interbred to generate wild type, heterozygous and knockout offspring (F2), shown here. Heterozygous F2 offspring were again interbred to generate F3. Within two generations of IFN $\gamma$  heterozygous interbreeding, *A. muciniphila* levels are normalized across genotypes, presumably due to absence of initial exposure from parents. Glucose tolerance curves shown as mean  $\pm$  SEM, box plots represent median with 25th and 75th percentile borders and error bars represent min-max, bar charts are mean + SD, n=4 (IFN $\gamma$ KO/*Akk*<sub>neg</sub>) or 5 (IFN $\gamma$ KO/*Akk*<sub>pos</sub>), \*p<0.05 by one-tailed Mann-Whitney test.

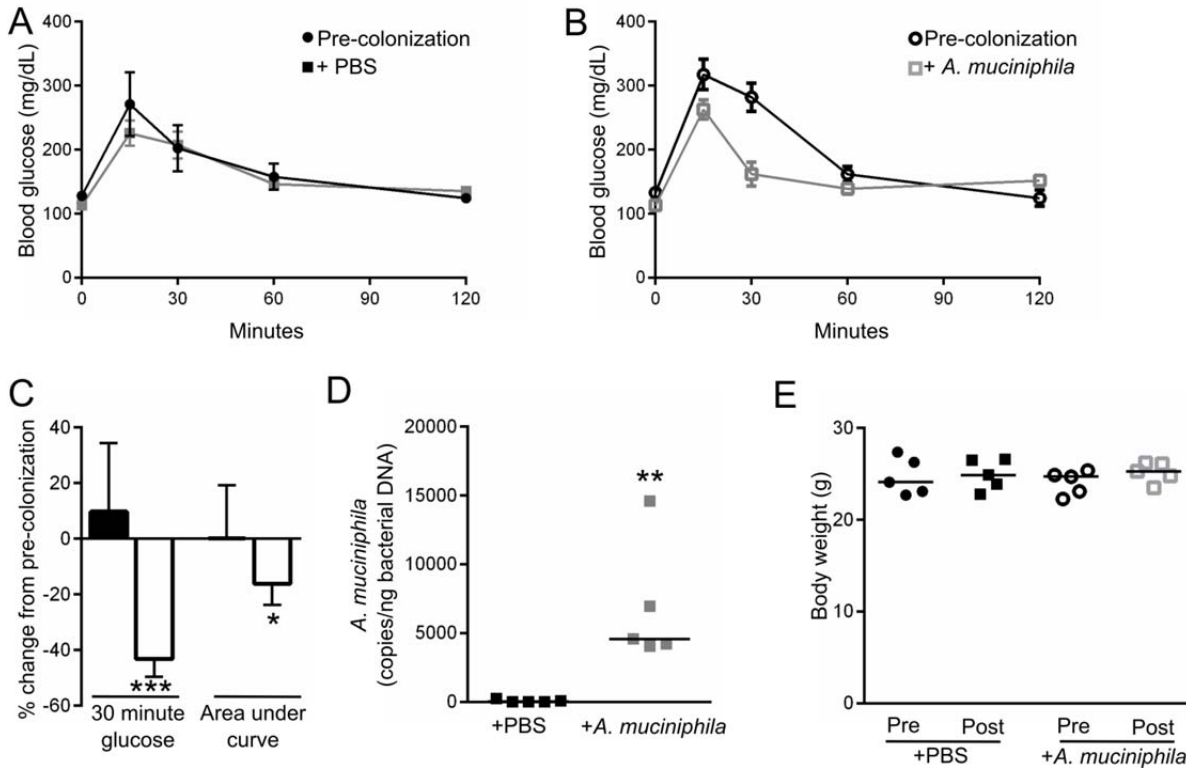

Supplementary

**Figure 5: *A. muciniphila* improves glucose tolerance in lean wild type mice**

**(A-B)** Glucose tolerance in lean wild type mice before (day 0) and after (day 14) mock colonization (A) or colonization with *A. muciniphila* shows that mock colonization mice maintain glucose tolerance levels, while mice given *A. muciniphila* (B) improve glucose tolerance two weeks post-colonization. **(C)** Quantification of percent change of area under the curve of the glucose tolerance test and 30 minute blood glucose from pre- to post-colonization time point for each colonization group. **(D)** *A. muciniphila* abundance (copies/ng total 16S DNA) by qPCR at day 14 post colonization. **(E)** Body weights of each group pre- and post-colonization. N=5 per group. Glucose tolerance curves shown as mean  $\pm$  SEM, bar charts are mean + SD, and dot plots display median line. \* $p < 0.05$ , \*\* $p < 0.01$ , \*\*\* $p < 0.001$  by one-tailed Mann-Whitney test.

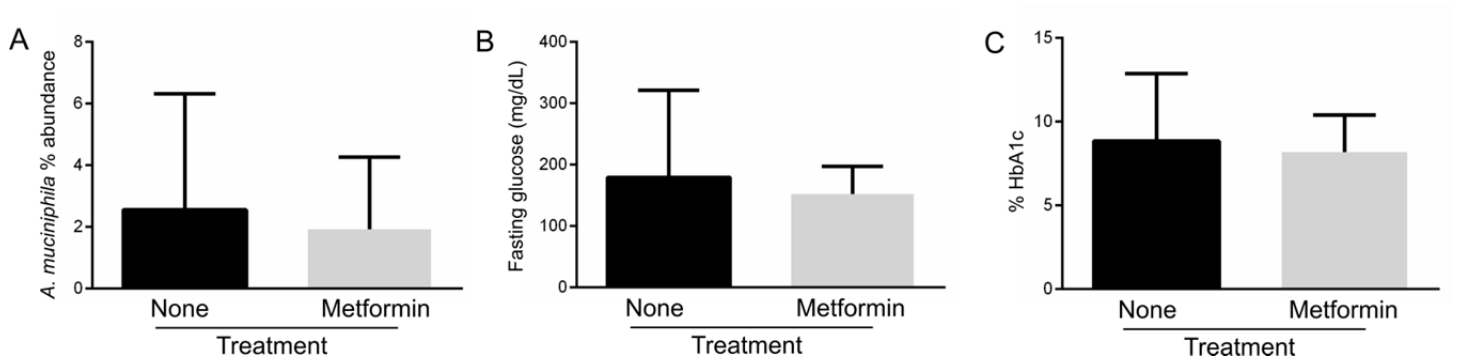

**Supplementary Figure 6: Metformin treatment does not affect levels of *A. muciniphila***

*A. muciniphila* percent abundance (A), fasting glucose (B) and % HbA1c (C) in untreated (n=5) and metformin treated (n=6) type 2 diabetic subjects. Bar charts represent mean + 95% confidence intervals.



Supplementary Table 1: Differentially abundant microbes in breeding-derived IFN $\gamma$ KO/*Akk*<sub>neg</sub> versus IFN $\gamma$ KO/native *Akk*<sub>pos</sub>

| Parametric p-value | FDR     | IFN $\gamma$ KO <i>Akk</i> <sub>neg</sub> | IFN $\gamma$ KO native <i>Akk</i> <sub>pos</sub> | Fold-change | UniqueID                                                                                                       |
|--------------------|---------|-------------------------------------------|--------------------------------------------------|-------------|----------------------------------------------------------------------------------------------------------------|
| < 1e-07            | < 1e-07 | 1.30E-05                                  | 0.01                                             | 0.0012      | k__Bacteria;p__Verrucomicrobia;c__Verrucomicrobiae;o__Verrucomicrobiales;f__Verrucomicrobiaceae;g__Akkermansia |
| 1.04E-05           | 0.00241 | 1.20E-05                                  | 0.00063                                          | 0.02        | k__Bacteria;p__Firmicutes;c__Clostridia;o__Clostridiales;f__Peptostreptococcaceae;g__                          |
| 5.26E-05           | 0.00812 | 0.016                                     | 0.0073                                           | 2.23        | k__Bacteria;p__Firmicutes;c__Clostridia;o__Clostridiales;f__;g__                                               |
| 0.0003547          | 0.0411  | 0.0012                                    | 1.30E-05                                         | 96.04       | k__Bacteria;p__Proteobacteria;c__Betaproteobacteria;o__Burkholderiales;f__Alcaligenaceae;g__Sutterella         |

Supplementary Table 2: Differentially abundant microbes upon *A. muciniphila* colonization

| UniqueID                                                                                                                     | Correlation with GTT_AUC |         | pre versus post colonization |          |                            |                                |                            |
|------------------------------------------------------------------------------------------------------------------------------|--------------------------|---------|------------------------------|----------|----------------------------|--------------------------------|----------------------------|
|                                                                                                                              | Correlation coefficient  | p-value | p-value                      | FDR      | Abundance pre-colonization | Abundance in post-colonization | Akk v.s. noAkk Fold-change |
| k__Bacteria;p__Firmicutes;<br>c__Bacilli;o__Bacillales;f__<br>Staphylococcaceae;g__Sta phylococcus                           | -0.571                   | 0.1943  | 1.20E-06                     | 0.000556 | 0.0019                     | 1.30E-05                       | 145.8                      |
| k__Bacteria;p__Proteobact<br>eria;c__Betaproteobacteria ;o__Burkholderial<br>es;f__Alc aligenaceae;g__Sutterella             | -0.333                   | 0.3847  | 6.54E-05                     | 0.0151   | 0.0015                     | 0.00036                        | 4.26                       |
| k__Bacteria;p__Verrucomi<br>crobia;c__Verrucomicrobia<br>e;o__Verrucomicrobiales;f__<br>_Verrucomicrobiaceae;g__ Akkermansia | -0.771                   | 0.1027  | 0.0004574                    | 0.0706   | 0.00052                    | 9.00E-06                       | 57.54                      |
